# Supplementary material for: Patient-derived tumor immune microenvironments in patient-derived xenografts of lung cancer
Source: Springer Nature journal article supplement (doi:10.1186/s12967-018-1704-3), 2018-11-26
Supplement: MOESM1 [file 16295730]

**Additional file 1: Table S1 Clinical information of PDXs used for TIL studies**

| Case ID | Age | Sex | Ethnicity | Pathology          | Grades   | Stages  | Tumor Volume | Smoke status | Pretreatment           | Passage | In vivo Days |
|---------|-----|-----|-----------|--------------------|----------|---------|--------------|--------------|------------------------|---------|--------------|
| 1       | 70  | F   | White     | adenocarcinoma     | Moderate | T2aN0M0 | 7.62         | Former       | NO                     | F1      | 292          |
| 2       | 77  | M   | White     | adenocarcinoma     | Moderate | T2bN1M0 | 156.00       | Former       | Carboplatin/Pemetrexed | F1      | 90           |
| 3       | 65  | F   | White     | adenocarcinoma     | Poor     | T4N2M0  | 7.20         | Former       | NO                     | F1      | 181          |
| 4       | 74  | M   | White     | adenocarcinoma     | Moderate | T3N0M0  | 0.72         | Former       | NO                     | F1      | 166          |
| 5       | 66  | F   | White     | adenocarcinoma     | Poor     | T2bN0M0 | 110.00       | Former       | NO                     | F1      | 128          |
| 6       | 70  | F   | White     | squamous cell ca.  | Moderate | T3N2M1  | 273.00       | Former       | NO                     | F1      | 98           |
| 7       | 39  | F   | White     | adenocarcinoma     | Moderate | T2aN1M0 | 29.64        | Never        | NO                     | F1      | 92           |
| 8       | 72  | F   | White     | squamous cell ca.  | Moderate | T2aN0M0 | 63.00        | Former       | NO                     | F1      | 144          |
| 9       | 83  | M   | White     | adenocarcinoma     | Moderate | T2aN0M0 | 45.15        | Former       | NO                     | F1      | 88           |
| 10      | 62  | M   | White     | squamous cell ca.  | Poor     | T2bN2M0 | 122.50       | Current      | NO                     | F1      | 69           |
| 11      | 66  | F   | White     | adenocarcinoma     | Poor     | T2bN1M0 | 96.00        | Former       | Cisplatin/Docetaxel    | F1      | 64           |
| 12      | 70  | F   | White     | adenocarcinoma     | Moderate | T2aN0M1 | 43.74        | Current      | NO                     | F1      | 121          |
| 13      | 59  | F   | White     | adenocarcinoma     | Poor     | T3N1M0  | 21.00        | Former       | NO                     | F1      | 98           |
| 14      | 82  | F   | White     | adenocarcinoma     | Moderate | T3N0M0  | 162.00       | NA           | NO                     | F2      | 275          |
| 15      | 68  | M   | White     | adenocarcinoma     | Moderate | T1N0M0  | 1.50         | Former       | NO                     | F2      | 514          |
| 16      | 70  | F   | Hispanic  | adenocarcinoma     | Well     | T3N0M0  | 157.50       | NA           | NO                     | F2      | 97           |
| 17      | 65  | F   | White     | adenocarcinoma     | Poor     | T2aN1M1 | 25.20        | Former       | NO                     | F2      | 315          |
| 18      | 54  | F   | Black     | giant/spindle cell | Poor     | T3N2M0  | 48.00        | Former       | NO                     | F2      | 252          |
| 19      | 55  | M   | White     | adenocarcinoma     | Poor     | T3N2M0  | 20.25        | Former       | Cisplatin/Pemetrexed   | F2      | 84           |
| 20      | 70  | F   | White     | squamous cell ca.  | poor     | T1bn0m0 | 9.35         | Current      | NO                     | F2      | 211          |
| 21      | 67  | F   | White     | adenocarcinoma     | NA       | TxN2M1  |              | Former       | Carboplatin/Pemetrexed | F2      | 239          |
| 22      | 57  | F   | Asian     | neuroendocrine ca. | Well     | T2aN0M0 | 27.00        | Former       | NO                     | F2      | 237          |
| 23      | 85  | M   | White     | adenosquamous ca.  | poor     | T2bN1M0 | 73.30        | Former       | NO                     | F2      | 136          |
| 24      | 80  | F   | White     | squamous cell ca.  | poor     | T3N1M1  | 110.00       | Former       | NO                     | F2      | 125          |
| 25      | 70  | M   | Hispanic  | pleomorphic        | Poor     | T3N0M0  | 420.00       | Former       | NO                     | F2      | 136          |

**Additional file 1: Table S2 Clinical information of fresh tumor samples used for TIL culture and analysis**

| <b>Case ID</b> | <b>Age</b> | <b>Sex</b> | <b>Ethnicity</b> | <b>Pathology</b>   | <b>Grades</b> | <b>Stages</b> | <b>Tumor Volume (cm3)</b> | <b>Smoke status</b> | <b>Pretreatment</b> |
|----------------|------------|------------|------------------|--------------------|---------------|---------------|---------------------------|---------------------|---------------------|
| PT26           | 78         | M          | White            | Squamous cell ca.  | Moderate      | T2N0M0        | 43.4                      | Former              | No                  |
| PT27           | 57         | M          | White            | Squamous cell ca.  | Moderate      | T1N0M0        | 19.2                      | Never               | Cisplatin/Taxol     |
| PT28           | 41         | M          | White            | Neuroendocrine ca. | Moderate      | T4N1MX        | 169.2                     | Never               | Cisplatin/etoposide |
| PT29           | 66         | F          | White            | Adenocarcinoma     | Well          | T1N1M0        | 13.3                      | Former              | No                  |
